# Supplementary material
Source: ML conference proceedings conference paper supplement (https://openreview.net/forum?id=8rLyeohMPY)
Supplement: supplementary_material [file attachment]

000  
001  
002  
003  
004  
005  
006  
007  
008  
009  
010  
011  
012  
013  
014  
015  
016  
017  
018  
019  
020  
021  
022  
023  
024  
025  
026  
027  
028  
029  
030  
031  
032  
033  
034  
035  
036  
037  
038  
039  
040  
041  
042  
043  
044  
045  
046  
047  
048  
049  
050  
051  
052  
053

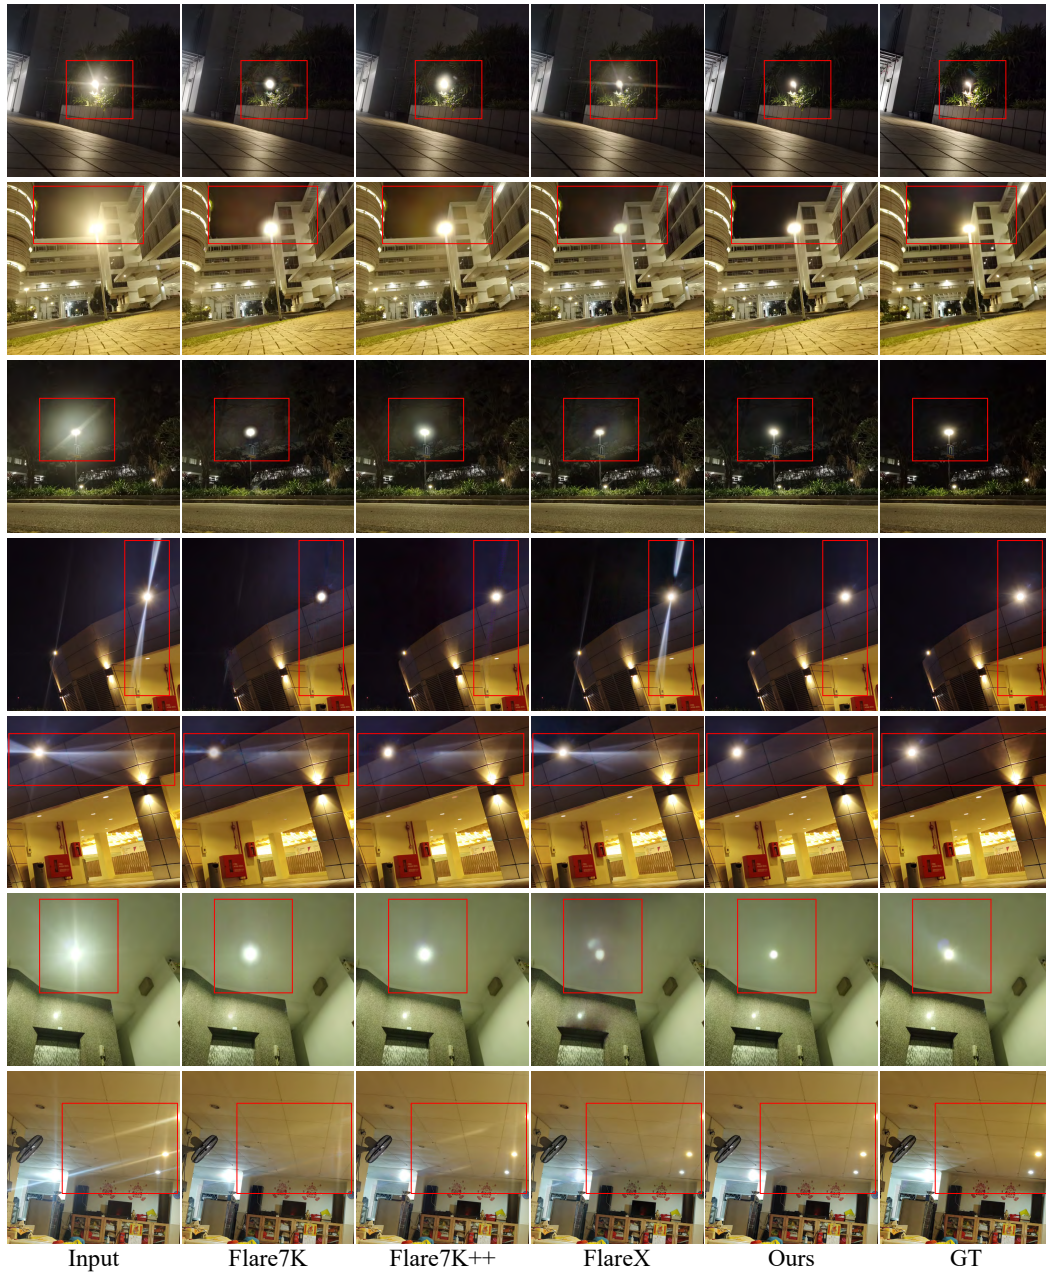

Figure 1: Visual comparison of flare removal on the Flare7k real test set. The name of each column represents the dataset that is used to train Uformer.

054  
055  
056  
057  
058  
059  
060  
061  
062  
063  
064  
065  
066  
067  
068  
069  
070  
071  
072  
073  
074  
075  
076  
077  
078  
079  
080  
081  
082  
083  
084  
085  
086  
087  
088  
089  
090  
091  
092  
093  
094  
095  
096  
097  
098  
099  
100  
101  
102  
103  
104  
105  
106  
107

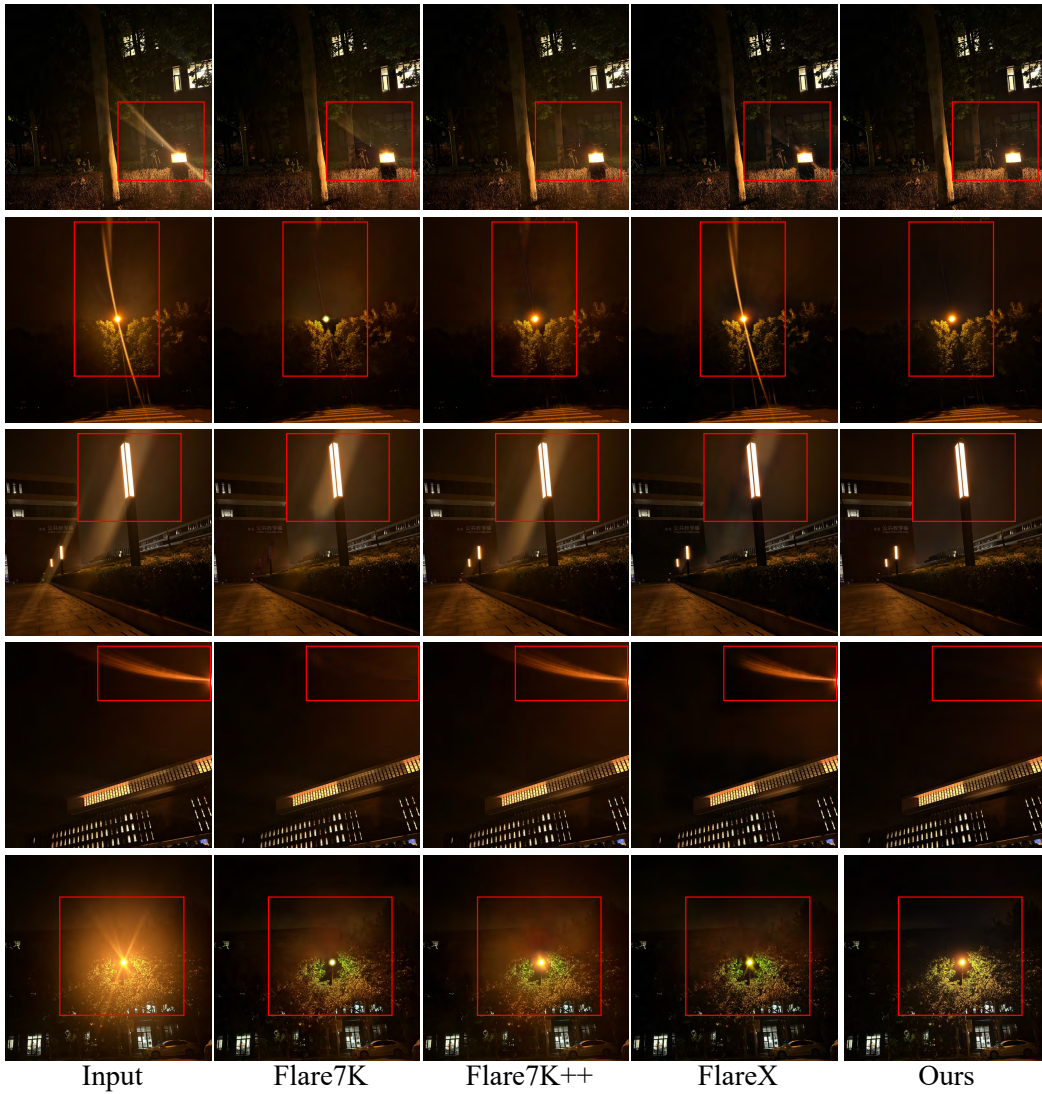

Figure 2: Visual comparison of flare removal on the FlareX test set. The name of each column represents the dataset that is used to train Uformer.

108  
109  
110  
111  
112  
113  
114  
115  
116  
117  
118  
119  
120  
121  
122  
123  
124  
125  
126  
127  
128  
129  
130  
131  
132  
133  
134  
135  
136  
137  
138  
139  
140  
141  
142  
143  
144  
145  
146  
147  
148  
149  
150  
151  
152  
153  
154  
155  
156  
157  
158  
159  
160  
161

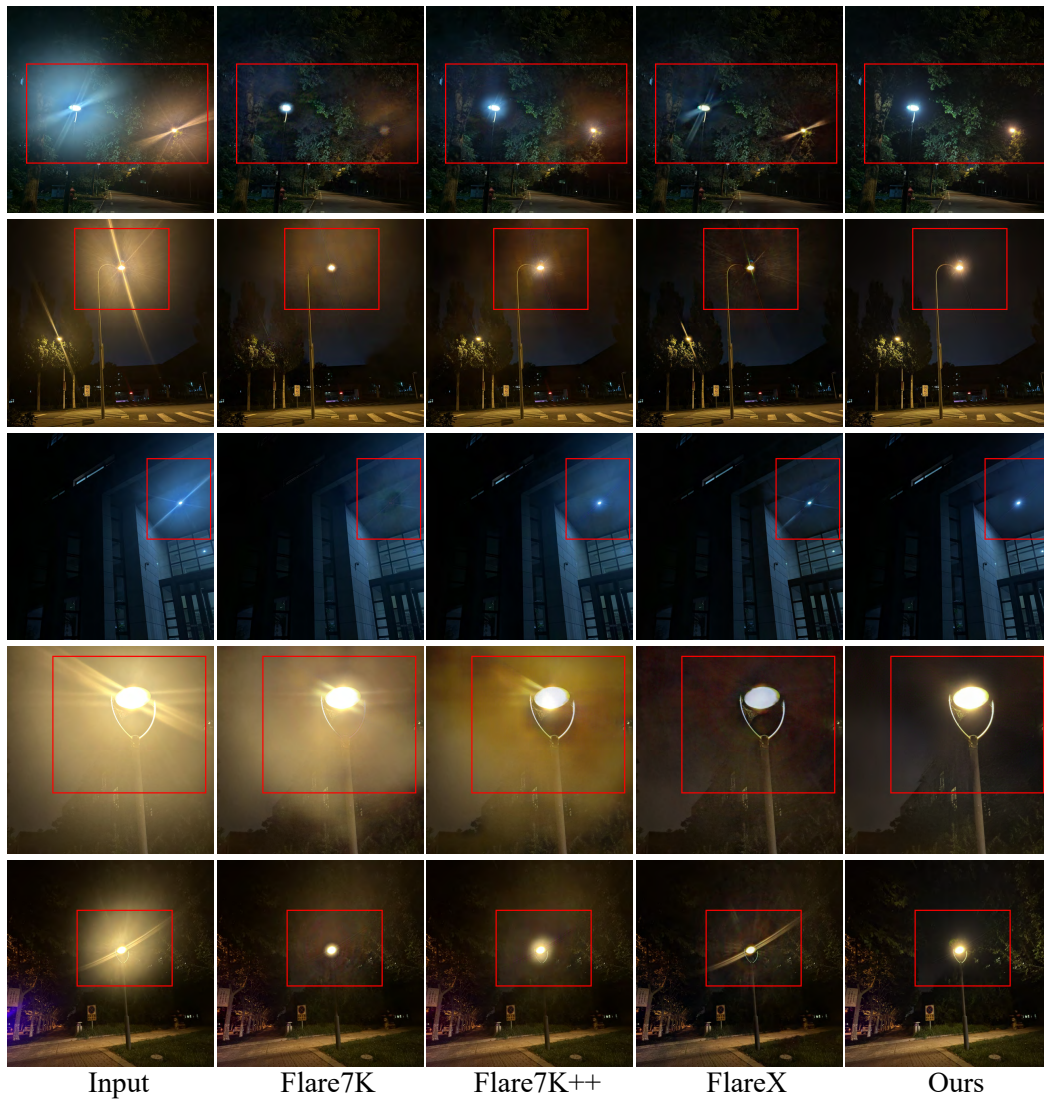

Figure 3: Visual comparison of flare removal on the FlareX test set. The name of each column represents the dataset that is used to train Uformer.

162  
 163  
 164  
 165  
 166  
 167  
 168  
 169  
 170  
 171  
 172  
 173  
 174  
 175  
 176  
 177  
 178  
 179  
 180  
 181  
 182  
 183  
 184  
 185  
 186  
 187  
 188  
 189  
 190  
 191  
 192  
 193  
 194  
 195  
 196  
 197  
 198  
 199  
 200  
 201  
 202  
 203  
 204  
 205  
 206  
 207  
 208  
 209  
 210  
 211  
 212  
 213  
 214  
 215

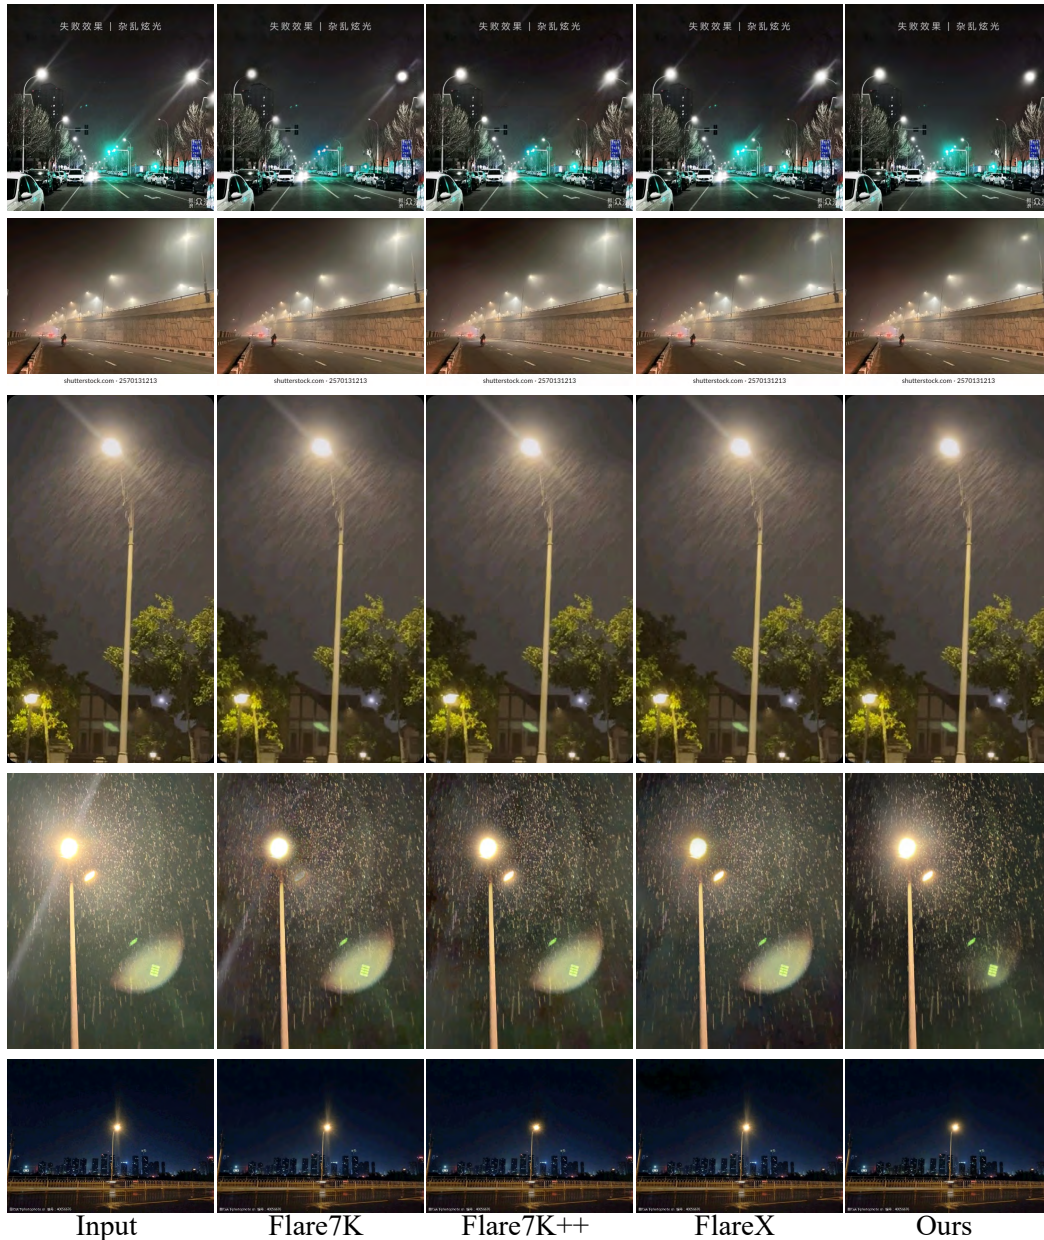

Figure 4: Visual comparison of flare removal on the test set collected from Google Image Search. The name of each column represents the dataset that is used to train Uformer.

216  
217  
218  
219  
220  
221  
222  
223  
224  
225  
226  
227  
228  
229  
230  
231  
232  
233  
234  
235  
236  
237  
238  
239  
240  
241  
242  
243  
244  
245  
246  
247  
248  
249  
250  
251  
252  
253  
254  
255  
256  
257  
258  
259  
260  
261  
262  
263  
264  
265  
266  
267  
268  
269

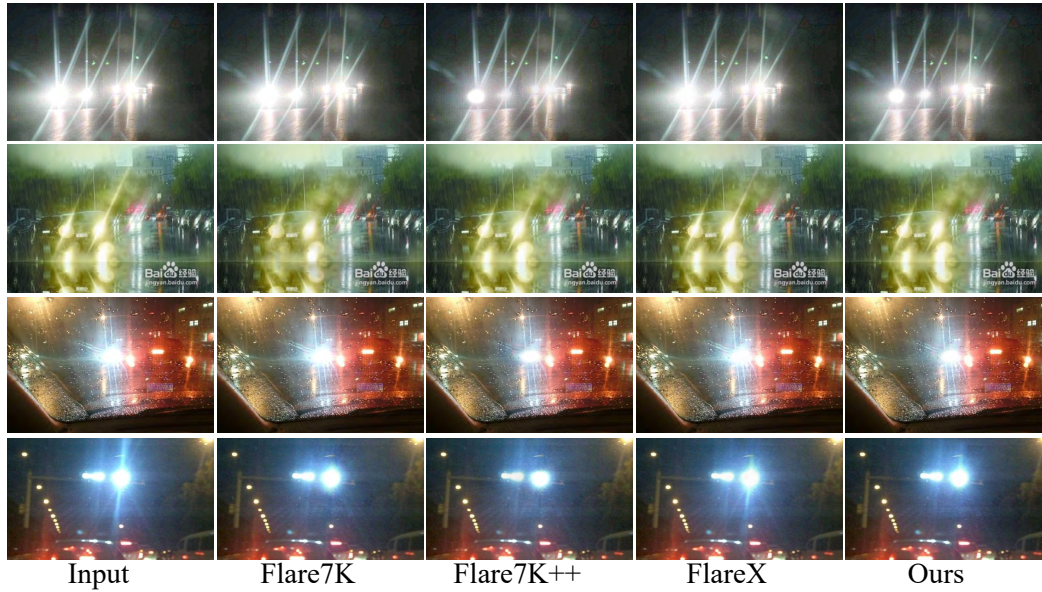

Figure 5: Visual comparison of flare removal on the test set collected from Google Image Search. The name of each column represents the dataset that is used to train Uformer.

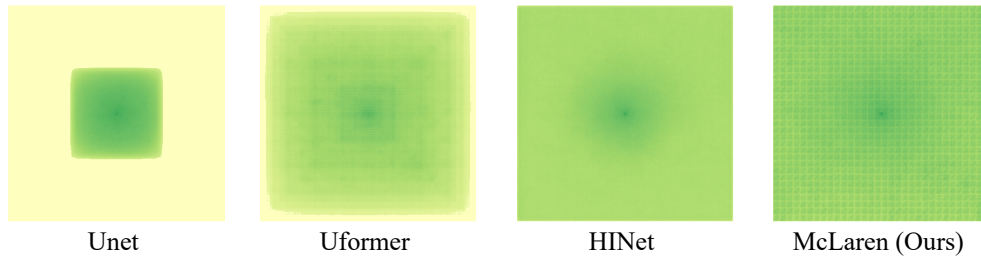

Figure 6: The Effective Receptive Field (ERF) visualization for Unet, Uformer, HINet and our McLaren.
